# Supplementary material for: A validation of machine learning-based risk scores in the prehospital setting
Source: PLOS journal article supplement (doi:10.1371/journal.pone.0226518), 2019-12-13

# A validation of machine learning-based risk scores in the prehospital setting

Douglas Spangler

Thomas Hermansson

David Smekal

Hans Blomberg

**Table 1**

|                        | Training dataset (2016-2017) |                   |              | Test dataset (2018) |                   |              |
|------------------------|------------------------------|-------------------|--------------|---------------------|-------------------|--------------|
|                        | Excluded, N                  | Excluded, percent | Remaining, N | Excluded, N         | Excluded, percent | Remaining, N |
| Original               |                              |                   | 45045        |                     |                   | 23623        |
| No dispatch CDSS data  | 2358                         | 5.5               | 42687        | 857                 | 3.8               | 22766        |
| Missing PIN            | 2113                         | 5.2               | 40574        | 1244                | 5.8               | 21522        |
| No ambulance journal   | 2526                         | 6.6               | 38048        | 933                 | 4.5               | 20589        |
| No ambulance transport | 3879                         | 11.4              | 34169        | 2461                | 13.6              | 18128        |
| No hospital journal    | 3958                         | 13.1              | 30211        | 1429                | 8.6               | 16699        |
| No ED visit            | 2939                         | 10.8              | 27272        | 1590                | 10.5              | 15109        |
| Missing > 2 vitals     | 1336                         | 5.2               | 25936        | 829                 | 5.8               | 14280        |
| Patient age < 18       | 1328                         | 5.4               | 24608        | 685                 | 5                 | 13595        |
| Included in study      | 20437                        | 45.4              | 24608        | 10028               | 42.5              | 13595        |

Table 2

|                                  | Priority            |                     |                     |                     |                     |
|----------------------------------|---------------------|---------------------|---------------------|---------------------|---------------------|
|                                  | 1A                  | 1B                  | 2A                  | 2B                  | Total               |
| N                                | 1283                | 15533               | 17227               | 4160                | 38203               |
| Age, mean                        | 56.2<br>(54.8-57.5) | 64.5<br>(64.1-64.8) | 67.5<br>(67.2-67.8) | 67.3<br>(66.7-68.0) | 65.9<br>(65.7-66.1) |
| Female, percent                  | 46.1<br>(43.3-48.8) | 49.4<br>(48.6-50.1) | 53.9<br>(53.1-54.6) | 54.5<br>(53.0-56.2) | 51.9<br>(51.3-52.4) |
| Emergent transport , percent     | 38.7<br>(36.0-41.5) | 24.6<br>(23.9-25.2) | 4.3<br>(4.0-4.6)    | 2.2<br>(1.8-2.6)    | 13.5<br>(13.1-13.8) |
| Ambulance intervention*, percent | 87.9<br>(86.0-89.8) | 87.4<br>(86.8-87.9) | 71.1<br>(70.4-71.8) | 62.1<br>(60.6-63.5) | 77.3<br>(76.9-77.7) |
| Missing vitals, percent          | 33.8<br>(30.9-36.5) | 25.7<br>(25.0-26.4) | 24.4<br>(23.8-25.0) | 23.8<br>(22.5-25.0) | 25.2<br>(24.7-25.6) |
| NEWS value, mean                 | 5.79<br>(5.58-6.02) | 3.76<br>(3.71-3.82) | 2.97<br>(2.92-3.02) | 2.40<br>(2.31-2.48) | 3.32<br>(3.29-3.36) |
| Prior contacts (30 days), mean   | 0.21<br>(0.17-0.24) | 0.17<br>(0.16-0.18) | 0.17<br>(0.16-0.18) | 0.23<br>(0.21-0.25) | 0.18<br>(0.17-0.18) |
| Intensive Care Unit, percent     | 10.0<br>(8.3-11.6)  | 3.5<br>(3.2-3.8)    | 1.7<br>(1.5-1.8)    | 1.6<br>(1.2-1.9)    | 2.7<br>(2.5-2.8)    |
| In-hospital death, percent       | 8.7<br>(7.2-10.2)   | 4.0<br>(3.7-4.3)    | 3.7<br>(3.4-4.0)    | 3.9<br>(3.4-4.5)    | 4.0<br>(3.8-4.2)    |
| Critical care, percent           | 15.7<br>(13.6-17.5) | 6.6<br>(6.2-7.0)    | 4.7<br>(4.4-5.0)    | 4.4<br>(3.8-5.1)    | 5.8<br>(5.6-6.0)    |
| Admitted, percent                | 51.9<br>(49.0-54.6) | 52.3<br>(51.6-53.1) | 52.3<br>(51.6-53.1) | 49.2<br>(47.5-50.6) | 52.0<br>(51.5-52.5) |
| 2-day mortality, percent         | 4.8<br>(3.7-6.0)    | 1.6<br>(1.4-1.8)    | 0.7<br>(0.6-0.9)    | 0.7<br>(0.5-1.0)    | 1.2<br>(1.1-1.3)    |

**Figure 1**

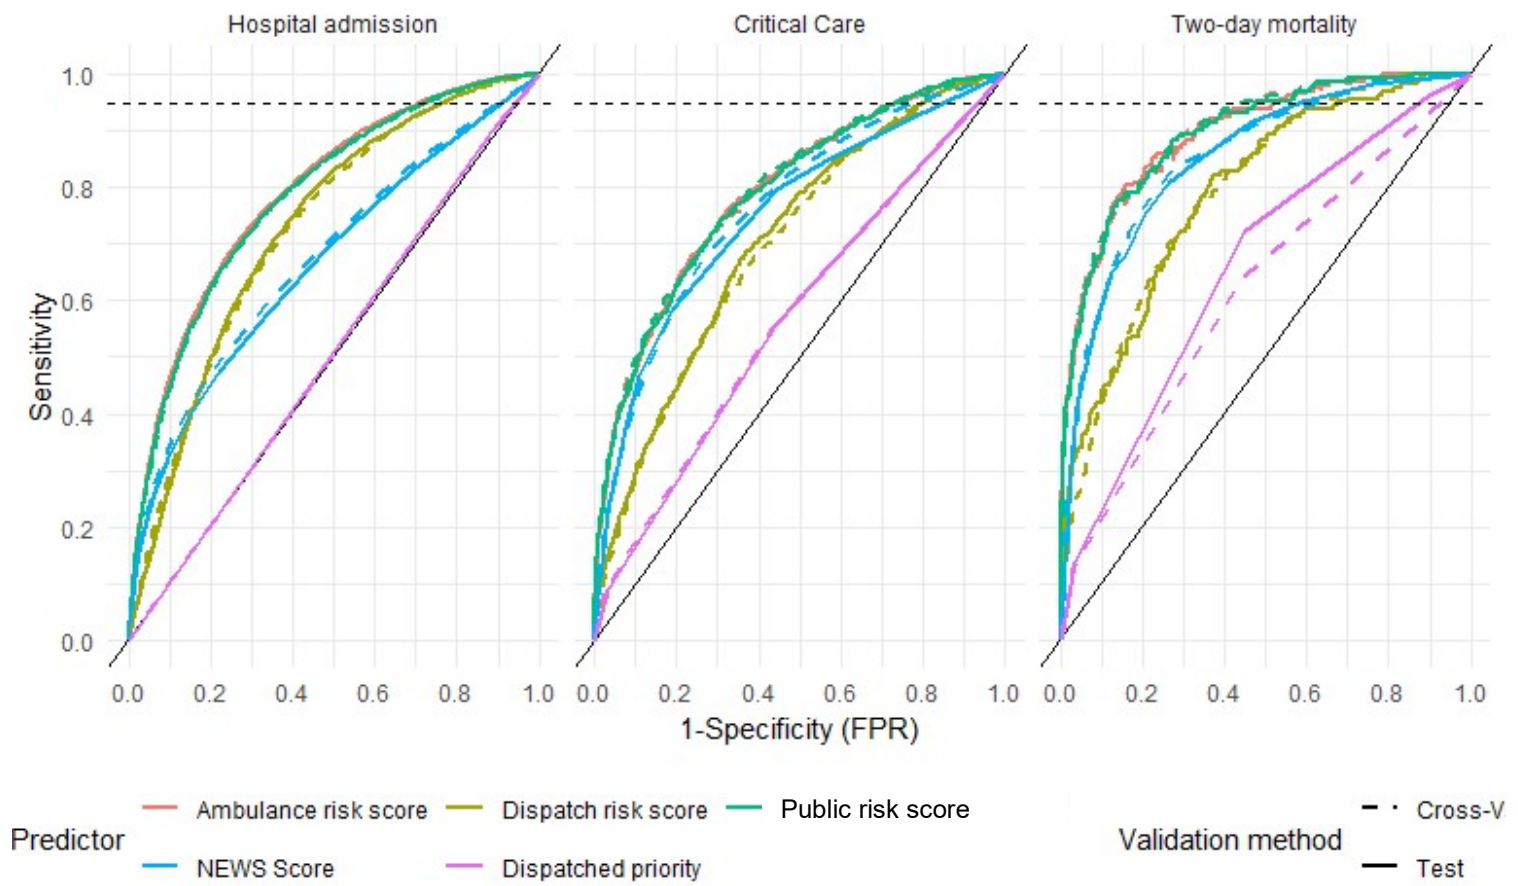

**Table 3**

| Concordance index (95% CI) |                    |                     |                     |                     |                      |                     |
|----------------------------|--------------------|---------------------|---------------------|---------------------|----------------------|---------------------|
| Validation method          | Outcome            | Dispatched priority | NEWS Score          | Dispatch risk score | Ambulance risk score | Public risk score   |
| Test                       | Hospital admission | 0.51<br>(0.50-0.52) | 0.66<br>(0.65-0.67) | 0.73<br>(0.72-0.73) | 0.79<br>(0.78-0.80)  | 0.78<br>(0.77-0.79) |
|                            | Critical Care      | 0.57<br>(0.55-0.59) | 0.75<br>(0.73-0.77) | 0.70<br>(0.68-0.72) | 0.79<br>(0.77-0.81)  | 0.79<br>(0.77-0.80) |
|                            | Two-day mortality  | 0.66<br>(0.62-0.70) | 0.85<br>(0.81-0.88) | 0.79<br>(0.76-0.82) | 0.89<br>(0.87-0.92)  | 0.89<br>(0.87-0.92) |
| Cross-Validated            | Hospital admission | 0.50<br>(0.50-0.51) | 0.67<br>(0.67-0.68) | 0.72<br>(0.72-0.73) | 0.79<br>(0.78-0.79)  | 0.78<br>(0.78-0.79) |
|                            | Critical Care      | 0.57<br>(0.56-0.59) | 0.76<br>(0.75-0.78) | 0.70<br>(0.68-0.71) | 0.79<br>(0.78-0.80)  | 0.79<br>(0.78-0.80) |
|                            | Two-day mortality  | 0.62<br>(0.58-0.65) | 0.85<br>(0.83-0.87) | 0.79<br>(0.77-0.81) | 0.89<br>(0.87-0.91)  | 0.89<br>(0.88-0.91) |

**Table 4**

| Type              | Priority | N    | Emergent transport , percent | Ambulance intervention*, percent | NEWS value, mean    | Critical care, percent | Admitted, percent   | 2-day mortality, percent |
|-------------------|----------|------|------------------------------|----------------------------------|---------------------|------------------------|---------------------|--------------------------|
| Current           | 1A       | 473  | 35.3<br>(31.3-39.3)          | 87.5<br>(84.6-90.5)              | 5.64<br>(5.26-6.00) | 14.6<br>(11.6-18.2)    | 48.6<br>(44.4-53.5) | 4.7<br>(2.8-6.8)         |
|                   | 1B       | 5657 | 22.5<br>(21.4-23.6)          | 86.4<br>(85.5-87.3)              | 3.70<br>(3.60-3.80) | 6.5<br>(5.9-7.2)       | 52.3<br>(50.9-53.6) | 1.7<br>(1.4-2.0)         |
|                   | 2A       | 6112 | 3.4<br>(3.0-3.9)             | 70.5<br>(69.4-71.7)              | 2.81<br>(2.74-2.89) | 4.7<br>(4.1-5.2)       | 51.5<br>(50.3-52.8) | 0.6<br>(0.4-0.9)         |
|                   | 2B       | 1353 | 1.7<br>(1.0-2.4)             | 60.5<br>(57.9-63.3)              | 2.33<br>(2.19-2.46) | 4.4<br>(3.4-5.4)       | 47.7<br>(45.0-50.3) | 0.4<br>(0.1-0.8)         |
| Hypo-<br>thetical | 1A       | 473  | 37.8<br>(33.4-42.1)          | 90.7<br>(87.9-93.2)              | 7.22<br>(6.85-7.61) | 22.2<br>(18.4-26.0)    | 75.3<br>(71.0-79.3) | 10.1<br>(7.6-13.1)       |
|                   | 1B       | 5657 | 15.3<br>(14.4-16.2)          | 77.9<br>(76.9-78.9)              | 4.22<br>(4.12-4.32) | 8.2<br>(7.5-8.9)       | 69.6<br>(68.5-71.0) | 1.6<br>(1.2-1.9)         |
|                   | 2A       | 6112 | 8.9<br>(8.2-9.7)             | 74.9<br>(73.8-76.0)              | 2.37<br>(2.31-2.44) | 3.3<br>(2.8-3.7)       | 40.3<br>(39.1-41.5) | 0.4<br>(0.3-0.6)         |
|                   | 2B       | 1353 | 6.1<br>(4.9-7.3)             | 75.0<br>(72.8-77.3)              | 1.55<br>(1.46-1.64) | 1.0<br>(0.5-1.6)       | 16.3<br>(14.3-18.3) | 0.0<br>(0.0-0.0)         |

Figure 2

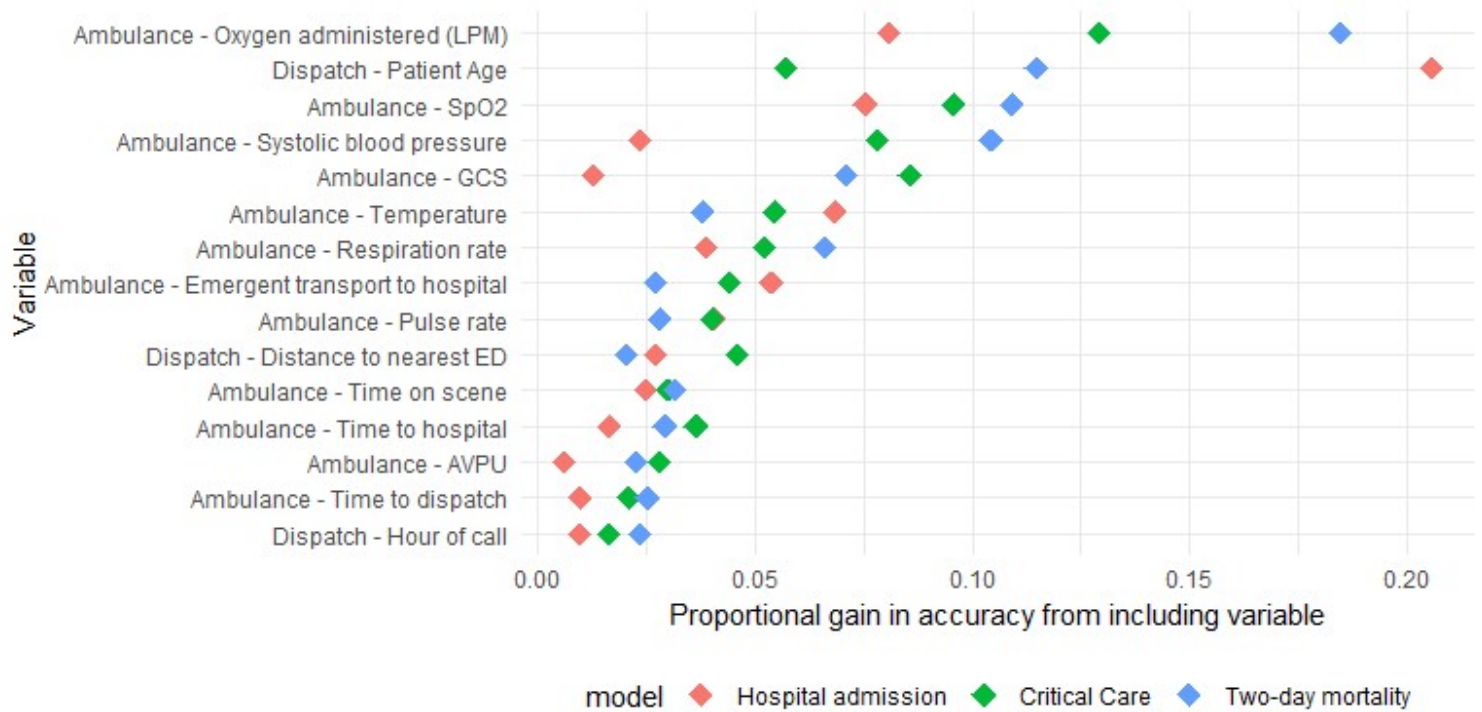

Supplement: S8 (10.1371/journal.pone.0226518.s008) [file journal.pone.0226518.s008]
